# Supplementary material for: Binding mode and free energy prediction of fisetin/β-cyclodextrin inclusion complexes
Source: PubMed Central journal article supplement (PMC4273227; doi:10.3762/bjoc.10.296), 2014-11-27
Supplement: Beilstein_J_Org_Chem-10-2789-s001.pdf [file Beilstein_J_Org_Chem-10-2789-s001.pdf]

**Supporting Information**  
**for**  
**Binding mode and free energy prediction of fisetin/  
 $\beta$ -cyclodextrin inclusion complexes**

Bodee Nutho<sup>1</sup>, Wasinee Khuntawee<sup>2</sup>, Chompoonut Rungnim<sup>3</sup>, Piamsook Pongsawadi<sup>1</sup>, Peter Wolschann<sup>4,5</sup>, Alfred Karpfen<sup>5</sup>, Nawee Kungwan<sup>6</sup>, Thanyada Rungrotmongkol<sup>\*,§,1</sup>

Address: <sup>1</sup>Department of Biochemistry, Faculty of Science, Chulalongkorn University, Bangkok 10330, Thailand, <sup>2</sup>Nanoscience and Technology Program, Graduate School, Chulalongkorn University, Bangkok, 10330, Thailand, <sup>3</sup>National Nanotechnology Center (NANOTEC), National Science and Technology Development Agency (NSTDA), 111 Thailand Science Park, Thanon Phahonyothin Tambon Khlong Nueng, Amphoe Khlong Luang, Pathum Thani 12120, Thailand, <sup>4</sup>Department of Pharmaceutical Technology and Biopharmaceutics, University of Vienna, Vienna 1090, Austria, <sup>5</sup>Institute of Theoretical Chemistry, University of Vienna, Vienna 1090, Austria and <sup>6</sup>Department of Chemistry, Faculty of Science, Chiang Mai University, Chiang Mai 50200, Thailand

Email: Thanyada Rungrotmongkol\* t.rungrotmongkol@gmail.com

\*Corresponding author.

<sup>§</sup>Tel: +66 2 2185426; Fax: + 66 22 185418.

**Decomposition of the free energy (kcal/mol) into the contributions  
from A- and B-rings of fisetin**

**Table S1:** Decomposition of the free energy (kcal/mol) into the contributions from A- and B-rings of fisetin for the nine systems of the fisetin/ $\beta$ CD complexes

|                    | $\Delta G_{MM-PBSA}$ |                 |                 | $\Delta G_{MM-GBSA}$ |                 |                 |
|--------------------|----------------------|-----------------|-----------------|----------------------|-----------------|-----------------|
|                    | Total                | A-ring          | B-ring          | Total                | A-ring          | B-ring          |
| <b>Complex I</b>   |                      |                 |                 |                      |                 |                 |
| I-1                | -27.9 $\pm$ 3.8      | -16.0 $\pm$ 4.1 | -11.9 $\pm$ 4.4 | -23.8 $\pm$ 3.1      | -14.4 $\pm$ 3.7 | -9.4 $\pm$ 4.3  |
| I-2                | -28.2 $\pm$ 3.8      | -16.4 $\pm$ 3.8 | -11.8 $\pm$ 3.8 | -23.9 $\pm$ 2.8      | -14.7 $\pm$ 3.5 | -9.2 $\pm$ 4.2  |
| I-3                | -28.2 $\pm$ 3.7      | -15.8 $\pm$ 4.1 | -12.4 $\pm$ 4.5 | -24.1 $\pm$ 2.5      | -14.3 $\pm$ 3.4 | -9.8 $\pm$ 4.2  |
| <b>Complex II</b>  |                      |                 |                 |                      |                 |                 |
| II-1               | -29.9 $\pm$ 4.3      | -15.6 $\pm$ 3.5 | -14.3 $\pm$ 2.8 | -26.1 $\pm$ 2.9      | -15.0 $\pm$ 2.6 | -11.1 $\pm$ 2.3 |
| II-2               | -30.1 $\pm$ 3.1      | -16.5 $\pm$ 3.0 | -13.6 $\pm$ 3.0 | -26.4 $\pm$ 2.3      | -15.6 $\pm$ 2.4 | -10.8 $\pm$ 2.4 |
| II-3               | -30.5 $\pm$ 3.1      | -16.4 $\pm$ 3.0 | -14.1 $\pm$ 2.8 | -26.2 $\pm$ 2.4      | -15.3 $\pm$ 2.4 | -10.9 $\pm$ 2.3 |
| <b>Complex III</b> |                      |                 |                 |                      |                 |                 |
| III-1              | -29.2 $\pm$ 3.7      | -16.1 $\pm$ 3.5 | -13.1 $\pm$ 3.3 | -25.5 $\pm$ 2.5      | -15.0 $\pm$ 2.4 | -10.5 $\pm$ 2.3 |
| III-2              | -29.5 $\pm$ 3.7      | -15.7 $\pm$ 3.6 | -13.8 $\pm$ 3.6 | -25.4 $\pm$ 2.3      | -14.8 $\pm$ 2.4 | -10.6 $\pm$ 2.4 |
| III-3              | -29.3 $\pm$ 3.9      | -15.2 $\pm$ 3.5 | -14.1 $\pm$ 3.1 | -25.5 $\pm$ 2.9      | -14.7 $\pm$ 2.4 | -10.8 $\pm$ 2.0 |
